1     **Mandatory or Voluntary COVID-19 Vaccination: Insights**  
2     **into the Knowledge, Attitude and Perception among**  
3     **Healthcare Workers at a Nursing College in South Africa**

4     Lindokuhle Mokoena<sup>1Y</sup>, Tanusha Singh<sup>1,2Y</sup>

5

6     **1** University of Johannesburg, Johannesburg, Gauteng, South Africa

7     **2** National Institute for Occupational Health, Johannesburg, Gauteng, South Africa

8

9     <sup>Y</sup> These authors contributed equally to this work.

10    \* Corresponding author: [tanushas@uj.ac.za](mailto:tanushas@uj.ac.za)

11

## 12 Abstract

13 Vaccine hesitancy has emerged as a significant global challenge impacting healthcare  
14 institutions, workplaces and governments alike. Despite concerted efforts by the  
15 government and numerous other institutions in South Africa, low vaccination rates  
16 persist (33% as of November 13, 2023), reflecting the persistence of this global  
17 challenge. This challenge is particularly pronounced in educational institutions such  
18 as institutions of higher learning in South Africa, where many people converge,  
19 increasing the risk of viral exposure. This study aims to assess the knowledge,  
20 attitudes, and perceptions of healthcare workers (HCWs) at a Nursing College  
21 regarding voluntary and mandatory COVID-19 vaccination. Employing a quantitative  
22 approach, a survey with closed-ended Likert-type questions was administered to 504  
23 individuals at the College. The sample size of 218 respondents was calculated based on  
24 a margin of error of 5%, a confidence level of 95%, and an additional 25% contingency  
25 for potential incomplete data, resulting in a final representative sample of 270  
26 respondents. The Statistical Package for Social Sciences (SPSS) was used for the  
27 analysis. Findings indicate a high uptake of voluntary COVID-19 vaccinations among  
28 HCWs, with some being mandated. Most HCWs demonstrated a strong commitment to  
29 safeguarding themselves and others. Despite concerns, HCWs thought the COVID-19  
30 vaccines were effective, and their views were supported by a low level of infection  
31 among the participants, underscoring its efficacy in preventing transmission. Effective  
32 communication emerged as a critical factor in addressing post-vaccination behaviours  
33 and enhancing vaccine acceptance. However, the findings also highlighted the need for  
34 tailored outreach strategies to specific audiences, such as pregnant women, and the  
35 importance of addressing concerns about adverse effects through clear and open  
36 communication. Several factors influencing the choice between mandatory and  
37 voluntary vaccination were identified, including eligibility concerns, religious  
38 convictions, and financial considerations. Notably, concerns about safety and  
39 knowledge gaps outweighed these factors, suggesting the need for targeted educational  
40 initiatives to bolster vaccine acceptance. In conclusion, this study provides valuable  
41 insights into the dynamics of vaccination acceptance among an influential occupational  
42 group, with implications for the acceptance of other vaccines. Vaccination efforts can  
43 be strengthened by addressing concerns, enhancing communication strategies, and  
44 tailoring outreach efforts to promote public health in light of future outbreaks.

45

46 **Keywords:** vaccine hesitancy, vaccine uptake, vaccination acceptance, disease  
47 prevention, risk reduction

## 48 **Author summary**

49 Conception and design of the study: LM, TS

50 Data acquisition: LM

51 Data analysis: LM

52 Interpretation of the data: LM, TS

53 Drafting of the paper: LM

54 Critical revision of the paper: TS

55 Both authors approved the final manuscript

56

## 57 **Introduction**

58 The evaluation of healthcare workers' (HCWs) views on voluntary and mandatory  
59 COVID-19 vaccination exposes various factors that impact their decision to get  
60 vaccinated. Research suggests that a notable portion of HCWs have an understanding  
61 of COVID-19 vaccines, which is a key determinant in their willingness to be vaccinated.  
62 For instance, a study conducted at a hospital in southern Nigeria showed that 76.6% of  
63 HCWs had good knowledge about COVID-19 vaccines, and 63% expressed readiness to  
64 receive the vaccine. Factors like age, sex, duration of employment and knowledge about  
65 the vaccines were found to influence their willingness.<sup>1</sup> Similarly, in Ghana, over half of  
66 HCWs were knowledgeable about COVID-19 vaccination. The majority held positive  
67 views on its efficacy, as evidenced by 85.9% having received at least one vaccine dose.<sup>2</sup>  
68 While HCWs generally have a positive attitude towards vaccination, initial hesitancy  
69 among some is not uncommon. The latter is corroborated by the findings of another  
70 study where 93.3% of HCWs got vaccinated, with 24.2% initially hesitant but later  
71 swayed by reliable information.<sup>3</sup> In Morocco, 93.3% of healthcare professionals were  
72 inoculated, with 53.1% opting for vaccination voluntarily, highlighting the significance  
73 of acceptance.<sup>4</sup>

74 In Indonesia, the perceptions of the COVID-19 vaccine were good however, their belief  
75 in its effectiveness was contrary. This highlights the importance of implementing  
76 strategies to reduce hesitancy and build trust.<sup>5</sup> The views on vaccination vary among  
77 HCWs, with some expressing worries about long-term effects and profit-driven  
78 motives. Such concerns were revealed in a Malaysian study despite a low vaccine  
79 hesitancy.<sup>6</sup> Other issues flagged among the Indian population were the lack of  
80 confidence in the vaccination and fear of side effects which influenced the uptake of  
81 booster doses. Furthermore, demographic factors like age, sex and residence are  
82 significant predictors.<sup>7</sup> The influence of HCWs on public attitudes towards vaccination  
83 cannot be underestimated; their acceptance and endorsement of vaccines are crucial  
84 for achieving herd immunity and ensuring healthcare services.<sup>8</sup> Research from Greece  
85 indicates that training HCWs and health science students on evidence-based practices  
86 is vital for improving vaccine uptake.<sup>9</sup> While the level of knowledge and positive

87 attitudes towards COVID-19 vaccination in report studies is promising, understanding  
88 the knowledge, attitudes and perceptions in a multiracial country like South Africa is  
89 important so that interventions are targeted among HCWs to address the specific  
90 issues pertaining to vaccine hesitancy. By taking this approach, healthcare workers  
91 will be able to make an impact on public health initiatives aimed at managing other  
92 emerging vaccine-related diseases. Therefore, this study aimed to assess the  
93 knowledge, attitude, and perceptions of HCWs at a Nursing College in South Africa  
94 regarding voluntary and mandatory COVID-19 vaccination. It also aimed to assess  
95 vaccination uptake, understand demographic influences, explore attitudes, and identify  
96 factors influencing the choice between mandatory and voluntary vaccination.

97

98

## 99 **Materials and methods**

### 100 **Study design**

101 This study used a quantitative cross-sectional research approach.

102

### 103 **Study setting**

104 The research site is a publicly funded Nursing College situated in the Mpumalanga  
105 Province, South Africa that provides training for nurses. The respondents were  
106 employed at the research location and had convenient access to vaccination facilities.  
107 They gained valuable knowledge about the factors that may impact individuals'  
108 decision to be vaccinated. The college's suggestion for compulsory vaccination brought  
109 extra importance, adding to the current discussion on the choice between voluntary  
110 and mandatory immunisation.

111

### 112 **Study population**

113 The study population included HCWs and nursing students enrolled at the college. The  
114 categories included the Diploma in General Nursing (R171) students, Degree in General  
115 Nursing (R425), totalling 504 individuals. Since nursing students are in the process of  
116 becoming fully qualified nurses, their involvement in patient care and the healthcare  
117 environment means they are recognised as part of the broader healthcare workforce  
118 in South Africa and thus is covered in the title by Healthcare workers. Individuals aged  
119 18 years and above of both sexes and those who were eligible for the COVID-19  
120 vaccination according to the National Department of Health Guidelines (SA Department  
121 of Health, 2023) met the inclusion criteria.<sup>10</sup> The study adopted a stratified random  
122 sampling, ensuring that each group was represented. The sample size of 218  
123 respondents was calculated based on a margin of error of 5% and a confidence level of  
124 95%. Adding an additional 25% contingency for incomplete data brought the total  
125 sample size to 270 respondents, thus forming a representative sample. This sample

126 size was allocated to each stratum based on proportional representation from the  
127 university population.

128

### 129 **Data collection and analysis**

130 A closed-ended Likert-type questionnaire was utilised (S1 file). The questionnaire  
131 covered demographics, vaccination prevalence and statements related to HCWs'  
132 knowledge, perceptions and attitudes toward voluntary and mandatory COVID-19  
133 vaccination. The questionnaire was designed based on a comprehensive literature  
134 review and theoretical framework that identified key factors influencing COVID-19  
135 vaccine hesitancy and acceptance. The questionnaire was piloted on ten people who  
136 were excluded from the main study. The pilot research results indicated a Cronbach's  
137 alpha value over 0.7, confirming the consistency and reliability of the findings. Google  
138 Forms was used during the anonymised survey to collect data. A link was distributed  
139 to all students and staff randomly selected through the College email system. Follow-  
140 ups were done through email reminders three days after the questionnaire had been  
141 sent. Each respondent was expected to take 15 minutes to complete the survey. The  
142 questionnaire was administered to respondents over a period of one month, from 1  
143 October 2023 to 31 October 2023.

144

145 Data underwent a cleaning process where incomplete surveys were eliminated and  
146 coded before being exported to the Statistical Package for Social Sciences (SPSS) (IBM,  
147 United States) for analysis. The uptake of COVID-19 vaccines among HCWs was  
148 described using measures of central tendency and measures of dispersion as of  
149 November 2023. It was also used to assess the respondents' level of knowledge,  
150 attitude and views on voluntary and mandated COVID-19 vaccines. Inferential analyses  
151 were conducted to ascertain if there were variations in the knowledge, attitude and  
152 views of HCWs about voluntary and required COVID-19 vaccines based on socio-  
153 demographic variables. Factor analysis was used to discover the characteristics or  
154 attitudes that predict volunteer immunisations.

155

### 156 **Ethical statement**

157 Ethical clearance was obtained from the University of Johannesburg's Ethics Review  
158 Committee [ethical clearance number REC 2298-2023]. Ethical principles, including  
159 prevention of harm, confidentiality, the right to withdraw and permission-seeking,  
160 were strictly adhered to. In addition, written informed consent was obtained from  
161 participants.

162

163

## 164 **Results**

165 **Demographic profile of respondents**

166 The demographic profile of the 372 study respondents shows a predominance of  
167 young, single female students (table 1). The largest age group is 26-40 years, and most  
168 respondents are students. There is a significant gender imbalance, with a much higher  
169 proportion of female respondents. Marital status is mostly single, and other  
170 occupations besides students are minimally represented. This demographic profile  
171 suggests the study may be conducted in an educational setting focusing on young adult  
172 female students.

173

174 **Table 1 Demographic characteristics of the study respondents (N = 372).**

| Characteristics                 | Number | Percent (%) |
|---------------------------------|--------|-------------|
| <b>Participant's Age</b>        |        |             |
| 18 - 25 years                   | 75     | 20.2        |
| 26 - 40 years                   | 144    | 38.8        |
| 41 - 55 years                   | 136    | 36.7        |
| Above 55 years                  | 16     | 4.3         |
| <b>Gender of Health Workers</b> |        |             |
| Male                            | 70     | 18.8        |
| Female                          | 302    | 81.2        |
| <b>Marital status</b>           |        |             |
| Single                          | 252    | 67.9        |
| Married                         | 103    | 27.8        |
| Divorced                        | 6      | 1.6         |
| Widowed                         | 10     | 2.7         |
| <b>Occupation</b>               |        |             |
| Student                         | 344    | 92.5        |
| Academic staff                  | 21     | 5.6         |
| Admin and support staff         | 7      | 1.9         |

175

176

177 **COVID-19 vaccination and infection status**

178 Table 2 shows that most of the respondents surveyed were vaccinated for COVID-19,  
179 with 28.1% getting booster shots while 42.4% were vaccinated without receiving their  
180 boosters. A smaller group were awaiting their second vaccination dose. Slightly less  
181 than a quarter (23.2) had not been vaccinated. The decision to get vaccinated was  
182 mainly left to the individuals (72.0%). There were instances of infection both before  
183 and after vaccination, highlighting the risks and the importance of booster shots for  
184 added protection.

185

186 **Table 2 COVID-19 vaccination and infection status among respondents.**

| Characteristics                                     | Number | Percent (%) |
|-----------------------------------------------------|--------|-------------|
| <b>Vaccination status (N = 370)</b>                 |        |             |
| Fully vaccinated (including boosters)               | 104    | 28.1        |
| Fully vaccinated (no boosters)                      | 157    | 42.4        |
| Vaccinated but awaiting 2 <sup>nd</sup> dose        | 23     | 6.2         |
| Not vaccinated                                      | 86     | 23.2        |
| <b>Mandatory vs voluntary vaccination (N = 275)</b> |        |             |
| Mandatory                                           | 77     | 28.0        |
| Voluntary                                           | 198    | 72.0        |
| <b>COVID-19 infections (N = 371)</b>                |        |             |

|                                         |     |      |
|-----------------------------------------|-----|------|
| Yes (before vaccination/not vaccinated) | 93  | 25.1 |
| Yes (after vaccination)                 | 52  | 14.0 |
| No                                      | 226 | 60.9 |

187

188

### 189 Respondents' knowledge of COVID-19 vaccinations

190 The Likert Scale responses in Table 3 highlight a range of knowledge levels among  
 191 participants regarding COVID-19 vaccinations. While 43.2% of those surveyed  
 192 acknowledged the effectiveness of the vaccines, there is still scepticism, with 27.1%  
 193 expressing disagreement. The majority (88.6%) recognised the importance of  
 194 continuing measures post-vaccination. Opinions on the vaccine's ability to prevent  
 195 illness were split, with 57.5% in agreement and 24.8% in disagreement. The topic of  
 196 implementing restrictions based on vaccination status varied, with 50.3% against and  
 197 35.1% in favour. Awareness of a vaccine information website in South Africa was high,  
 198 with 80.1% agreeing with its existence. Concerning side effects, 87.6% believed there  
 199 could be effects, while only 6.9% disagreed with this notion. Responses regarding  
 200 vaccinating individuals with existing conditions showed mixed views, with 61.9%  
 201 being supportive while 21.5% were against it. Views on vaccinating women garnered  
 202 feedback, with 42.2% in favour and 39.4% opposing it. The majority (66.0%) believed  
 203 that side effects typically diminish within days after vaccination; however, concerns  
 204 about long-term health issues had perspectives 41.7% agreed and 30.1% disagreed.

**Table 3 Likert Scale participant responses to knowledge on COVID-19 vaccinations (N = 372).**

| No. | Knowledge Statements                                                                                     | M (SD)      | Likert Scale Responses (n, %) |            |             |             |                |
|-----|----------------------------------------------------------------------------------------------------------|-------------|-------------------------------|------------|-------------|-------------|----------------|
|     |                                                                                                          |             | Strongly Disagree             | Disagree   | Neutral     | Agree       | Strongly Agree |
| K1  | COVID-19 vaccines are effective at keeping you from getting COVID-19.                                    | 3.15 (1.27) | 59 (16.0%)                    | 41 (11.1%) | 109 (29.6%) | 103 (28.0%) | 56 (15.2%)     |
| K2  | Maintain the regulations for preventing COVID-19 after vaccination (e.g. social distancing).             | 4.34 (0.90) | 7 (1.9%)                      | 14 (3.9%)  | 20 (5.5%)   | 129 (35.6%) | 192 (53.0%)    |
| K3  | COVID-19 vaccine will also help keep you from getting seriously ill even if you get COVID-19.            | 3.48 (1.29) | 37 (10.2%)                    | 53 (14.6%) | 64 (17.7%)  | 115 (31.8%) | 93 (25.7%)     |
| K4  | Fully vaccinated people are allowed to do everything while those not fully vaccinated have restrictions. | 2.74 (1.38) | 86 (23.8%)                    | 96 (26.5%) | 53 (14.6%)  | 79 (21.8%)  | 48 (13.3%)     |
| K5  | There is a website where you can apply for vaccination in South Africa.                                  | 4.12 (0.95) | 7 (1.9%)                      | 19 (5.2%)  | 46 (12.7%)  | 142 (39.2%) | 148 (40.9%)    |
| K6  | Like all other vaccines, this vaccine has the potential for some side effects.                           | 4.32 (0.96) | 11 (3.0%)                     | 14 (3.9%)  | 20 (5.5%)   | 119 (32.9%) | 198 (54.7%)    |
| K7  | Vaccines can be given to a person with pre-existing health conditions.                                   | 3.57 (1.19) | 24 (6.6%)                     | 54 (14.9%) | 60 (16.6%)  | 139 (38.4%) | 85 (23.5%)     |
| K8  | The vaccine can be given to pregnant women.                                                              | 2.99 (1.38) | 73 (20.1%)                    | 70 (19.3%) | 67 (18.5%)  | 95 (26.2%)  | 58 (16.0%)     |
| K9  | If there are side effects due to COVID-19 vaccination, they normally go away in a few days.              | 3.69 (1.18) | 26 (7.2%)                     | 36 (9.9%)  | 61 (16.9%)  | 139 (38.4%) | 100 (27.6%)    |

|     |                                                                         |                |               |               |                |               |               |
|-----|-------------------------------------------------------------------------|----------------|---------------|---------------|----------------|---------------|---------------|
| K10 | The COVID-19 vaccine can create long-term physical and health problems. | 3.21<br>(1.26) | 38<br>(10.5%) | 71<br>(19.6%) | 102<br>(28.2%) | 79<br>(21.8%) | 72<br>(19.9%) |
|-----|-------------------------------------------------------------------------|----------------|---------------|---------------|----------------|---------------|---------------|

m – mean; SD – standard deviation

205 **Respondents' attitudes and perceptions towards mandatory and voluntary**  
206 **vaccination**

207 The responses on the Likert Scale in Table 4 show the attitudes and perceptions  
208 regarding COVID-19 vaccinations among the participants. A significant number  
209 (86.6%) showed concern about the pandemic. In contrast, only a small percentage,  
210 1.7%, strongly disagreed. When it comes to the safety and effectiveness of the COVID-  
211 19 vaccine, 54.2% agreed, while 14.2% disagreed. The need to get vaccinated was  
212 acknowledged by 59.2% who agreed, although some (17.0%) disagreed. There was a  
213 level of awareness that family and neighbours should receive the vaccine, with 81.2%  
214 agreeing on this point. Many also felt motivated to encourage others to get vaccinated,  
215 with 72.6% agreeing. A significant portion (68.9%) believed that vaccination could help  
216 curb the spread of COVID-19, with a minority (10.2%) disagreeing. Nearly half (49.0%)  
217 of the respondents felt uninformed about vaccines. Some hesitancy towards  
218 vaccination was observed among respondents, with one-third agreeing. Regarding  
219 opinions on mandatory vaccination for HCWs, 46.3% agreed however, slightly fewer  
220 respondents disagreed (40.3%). On the contrary, opinions on the necessity of  
221 mandatory vaccination for all South Africans varied, with fewer agreeing (36.6%) than  
222 those disagreeing (44.3%).

**Table 4 Likert Scale participant responses regarding attitudes and perceptions towards COVID-19 vaccinations (N = 372).**

| No. | Attitude and Perception Statements                                       | M (SD)         | Likert Scale Responses (n, %) |                |                |                |                |
|-----|--------------------------------------------------------------------------|----------------|-------------------------------|----------------|----------------|----------------|----------------|
|     |                                                                          |                | Strongly Disagree             | Disagree       | Neutral        | Agree          | Strongly Agree |
| 1   | I am concerned about the COVID-19 pandemic.                              | 4.26<br>(0.85) | 6 (1.7%)                      | 8 (2.2%)       | 34<br>(9.5%)   | 149<br>(41.6%) | 161<br>(45.0%) |
| 2   | I think that the COVID-19 vaccine is safe and effective.                 | 3.54<br>(1.06) | 18<br>(5.0%)                  | 33<br>(9.2%)   | 113<br>(31.6%) | 124<br>(34.6%) | 70<br>(19.6%)  |
| 3   | If I am eligible for the vaccine, I need to take it as soon as possible. | 3.59<br>(1.14) | 23<br>(6.4%)                  | 38<br>(10.6%)  | 85<br>(23.7%)  | 129<br>(36.0%) | 83<br>(23.2%)  |
| 4   | I am aware that my family and neighbours should take the vaccine.        | 4.11<br>(0.95) | 12<br>(3.2%)                  | 10<br>(2.7%)   | 48<br>(12.9%)  | 158<br>(42.5%) | 144<br>(38.7%) |
| 5   | I should motivate my family and neighbours to take the vaccine.          | 3.92<br>(1.09) | 19<br>(5.1%)                  | 19<br>(5.1%)   | 64<br>(17.2%)  | 142<br>(38.2%) | 128<br>(34.4%) |
| 6   | I think vaccination will help us stop the spread of COVID-19.            | 3.80<br>(1.10) | 19<br>(5.1%)                  | 29<br>(7.8%)   | 68<br>(18.3%)  | 149<br>(40.1%) | 107<br>(28.8%) |
| 7   | I think I'm not informed enough about vaccines.                          | 2.70<br>(1.27) | 75<br>(20.2%)                 | 107<br>(28.8%) | 81<br>(21.8%)  | 71<br>(19.1%)  | 38<br>(10.2%)  |
| 8   | Are you hesitant to take the COVID-19 vaccine?                           | 2.89<br>(1.35) | 71<br>(19.1%)                 | 87<br>(23.4%)  | 89<br>(23.9%)  | 63<br>(16.9%)  | 62<br>(16.7%)  |
| 9   | Should the vaccine be mandatory for healthcare workers?                  | 3.08<br>(1.52) | 86<br>(23.1%)                 | 64<br>(17.2%)  | 50<br>(13.4%)  | 78<br>(21.0%)  | 94<br>(25.3%)  |



|    |                                                         |                |               |               |               |               |               |
|----|---------------------------------------------------------|----------------|---------------|---------------|---------------|---------------|---------------|
| 10 | Should the vaccine be mandatory for all South Africans? | 2.83<br>(1.45) | 98<br>(26.3%) | 67<br>(18.0%) | 71<br>(19.1%) | 72<br>(19.4%) | 64<br>(17.2%) |
|----|---------------------------------------------------------|----------------|---------------|---------------|---------------|---------------|---------------|

m – mean; SD – standard deviation

### 223 Association between sociodemographic characteristics and HCWs KAP

224 The study examined the knowledge, attitudes, and perceptions of HCWs towards  
 225 voluntary and mandatory COVID-19 vaccinations, focusing on sex and age differences  
 226 (Table 5). Analysis revealed that sex did not significantly impact attitudes and  
 227 perceptions, knowledge, or vaccine hesitancy, indicating similar levels of  
 228 understanding and acceptance between male and female HCWs. The ANOVA results  
 229 showed no significant sex-based differences in attitudes ( $F = 2.335$ ,  $p = 0.127$ ),  
 230 knowledge ( $F = 0.002$ ,  $p = 0.962$ ), or hesitancy ( $F = 0.988$ ,  $p = 0.321$ ).

231

232 Conversely, age significantly influenced attitudes and perceptions ( $F = 5.629$ ,  $p = 0.001$ ),  
 233 suggesting that older HCWs might have different views than their younger  
 234 counterparts. While the knowledge about COVID-19 vaccinations showed a trend  
 235 towards significance with age ( $F = 2.005$ ,  $p = 0.113$ ), it was not statistically significant,  
 236 implying potential age-related differences in understanding. Vaccine hesitancy was not  
 237 significantly affected by age ( $F = 1.941$ ,  $p = 0.123$ ), indicating that reluctance to  
 238 vaccinate was consistent across different age groups (Table 5). These findings suggest  
 239 that educational programmes could be tailored to address specific concerns across age  
 240 groups to enhance vaccine acceptance.

241

242 **Table 5 ANOVA Results for Mean Groups Based on Gender and Age.**

| Variable                         | Source               | Sum of Squares | Mean Square | F     | Sig.  |
|----------------------------------|----------------------|----------------|-------------|-------|-------|
| <b>Attitudes and Perceptions</b> | Gender               | 1.084          | 1.084       | 2.335 | 0.127 |
|                                  | Age (Between Groups) | 7.606          | 2.535       | 5.629 | 0.001 |
|                                  | Age (Within Groups)  | 165.304        | 0.450       |       |       |
| <b>Knowledge</b>                 | Gender               | 0.001          | 0.001       | 0.002 | 0.962 |
|                                  | Age (Between Groups) | 1.956          | 0.652       | 2.005 | 0.113 |
|                                  | Age (Within Groups)  | 119.338        | 0.325       |       |       |
| <b>Vaccine Hesitancy</b>         | Gender               | 0.660          | 0.660       | 0.988 | 0.321 |
|                                  | Age (Between Groups) | 3.856          | 1.285       | 1.941 | 0.123 |
|                                  | Age (Within Groups)  | 243.086        | 0.662       |       |       |

243

244

### 245 Factors Influencing COVID-19 Vaccination Hesitancy: Summary of Exploratory 246 Factor Analysis

247 The study explored factors influencing COVID-19 vaccination hesitancy among  
 248 respondents using exploratory factor analysis (EFA) on Likert scale statements (Table

249 6). The Kaiser-Meyer-Olkin (KMO) measure confirmed sampling adequacy with a value  
250 of 0.755, and Bartlett's test of sphericity was significant, indicating suitable conditions  
251 for factor analysis ( $\chi^2 = 483.602$ ,  $df = 15$ ,  $p < 0.001$ ). A single factor was identified,  
252 explaining 34.4% of the variance, with prominent loadings on fear of side effects  
253 (0.679) and insufficient knowledge (0.671), highlighting key contributors to vaccine  
254 hesitancy. Communalities analysis showed that concerns about eligibility, knowledge,  
255 and side effects saw increased explanation post-extraction, while cost and religious  
256 beliefs showed lesser impacts.

257

258 **Table 6 Factor Analysis Results for factors influencing COVID-19 vaccine**  
259 **hesitancy.**

| Analysis Results             | Values              | Variables                | Factor Loadings | Communalities     |
|------------------------------|---------------------|--------------------------|-----------------|-------------------|
| KMO Measure                  | 0.755               | Fear of Side Effects     | 0.679           | Initial: 0.383    |
| Bartlett's Test ( $\chi^2$ ) | 483.602 (p < 0.001) | Insufficient Knowledge   | 0.671           | Extraction: 0.461 |
| Eigenvalue for Factor 1      | 2.064               | Other Reasons            | 0.626           | Initial: 0.338    |
| % of Variance Explained      | 34.4%               | Ineligibility Perception | 0.561           | Extraction: 0.391 |
|                              |                     | Religious Beliefs        | 0.509           | Initial: 0.266    |
|                              |                     | Cost Concerns            | 0.432           | Extraction: 0.260 |

260

261

## 262 Discussion

263 The inclusion of individuals aged 26 to 40 years in this study aligns with Karlsson and  
264 Antfolk's (2021) research, which, although not specifically focusing on age distribution,  
265 emphasizes the importance of understanding vaccination confidence and behaviour  
266 across different age groups within the healthcare profession.<sup>11</sup> The gender distribution  
267 among the 372 HCWs at the Nursing College, where 81.2% were female and 18.8%  
268 male, reveals a significant gender imbalance. This finding is consistent with global  
269 trends identified by Dror et al. (2020), who noted that women often exhibit greater  
270 vaccine reluctance. Understanding these gender-specific attitudes is crucial for  
271 contextualising our analysis of vaccine uptake.<sup>12</sup>

272 The marital status distribution among these HCWs shows a predominance of single  
273 respondents (67.9%). This observation supports Karlsson and Antfolk's (2021)  
274 assertion on the importance of considering demographic variables like marital status  
275 when examining vaccination confidence and behaviour.<sup>11</sup> Additionally, the study

276 population was comprised predominantly of students (92.5%), with a small percentage  
277 in administrative (1.9%) and academic roles (5.6%). This distribution reflects global  
278 patterns highlighted by Dror et al. (2020),<sup>12</sup> which suggest that educational attainment  
279 and access to information influence vaccine willingness. These findings underscore the  
280 importance of understanding vaccine attitudes among younger demographics, such as  
281 students.

282

283 The current study revealed variability in COVID-19 vaccination uptake. While most  
284 respondents were fully vaccinated without boosters, others received both full  
285 vaccination and boosters. This high vaccination rate at the Nursing College indicates  
286 effective disease prevention. The data shows that most HCWs were vaccinated  
287 voluntarily, with only a few under mandate, demonstrating that their rights were  
288 respected while they actively chose to protect their colleagues and patients.  
289 Nonetheless, the debate on compulsory vaccination remains complex and warrants  
290 further consideration. The effectiveness of the COVID-19 vaccine is evident, as most  
291 respondents had not been previously infected, and only a few contracted the virus  
292 despite being vaccinated. Preferences for receiving health-related information via  
293 television and radio reflect the need for accessible communication, especially for older  
294 adults who may not use modern digital media extensively.

295

296 Islam et al. (2021) conducted a community survey evaluating attitudes towards COVID-  
297 19 vaccinations, providing essential context for understanding healthcare  
298 professionals' acceptance.<sup>13</sup> Their findings emphasise the importance of considering  
299 diverse perspectives and experiences, which helps clarify the complex landscape of  
300 vaccination uptake and hesitancy. Our study reveals that most HCWs at the Nursing  
301 College were vaccinated, predominantly voluntarily, supporting the acceptance of  
302 COVID-19 vaccinations. This result rejects the null hypothesis (H0) and confirms the  
303 alternate hypothesis (H1) that HCWs generally accept COVID-19 vaccinations, whether  
304 mandatory or voluntary.

305

306 The research indicates that COVID-19 vaccinations are considered highly effective.  
307 Although a few individuals were infected post-vaccination, this outcome supports the  
308 vaccine's safety and efficacy. The observed discrepancies in post-vaccination  
309 preventative measures highlight the need for clear communication to address ongoing  
310 preventive behaviours. Effective strategies must emphasise the continued importance  
311 of preventive measures even after vaccination. Poor communication about the efficacy  
312 of COVID-19 vaccinations in preventing severe disease reflects the need for better  
313 information dissemination. The lack of consensus on vaccination status limitations  
314 underscores the complexity of balancing individual liberties with public health  
315 measures.

316

317 Awareness of vaccine-related resources varied among respondents, highlighting the  
318 necessity of clear, accessible communication. Concerns about potential adverse effects  
319 emphasise the need for effective communication strategies to address these issues and  
320 reinforce the safety of vaccines. Divergent opinions on vaccinating individuals with pre-  
321 existing conditions and pregnant women stress the importance of targeted outreach  
322 strategies. The study reveals that adverse effects of COVID-19 vaccination are generally  
323 mild and short-lived. However, concerns about potential long-term effects necessitate  
324 skilful communication to build public confidence in vaccine safety. The correlation  
325 between knowledge, attitudes, and vaccine acceptance indicates that understanding  
326 these factors is crucial for enhancing vaccine uptake.

327

328 The study also reflects varying degrees of apprehension about the COVID-19 pandemic,  
329 with a majority expressing significant concern. Addressing the psychological impacts of  
330 the pandemic and incorporating mental health considerations into public health  
331 messaging is crucial. The survey indicates broad support for the effectiveness and  
332 safety of the vaccine. These findings underscore the urgency of vaccination and the  
333 need for focused communication strategies that highlight its importance. The study  
334 emphasises the role of community-based communication and social media in  
335 promoting vaccination. Encouraging family and neighbours to get vaccinated highlights  
336 the impact of social influencers on vaccine perceptions.

337

### 338 **The public health implications of this study**

339 The significant adoption of COVID-19 immunisations among HCWs, mostly via  
340 voluntary methods, highlights the need to encourage volunteer vaccination initiatives.  
341 It demonstrates the readiness of HCWs to safeguard themselves, their peers and  
342 patients against the illness. This is important for other vaccines, such as the influenza  
343 vaccine. Public health initiatives should continue to highlight the advantages of  
344 vaccination and address any lingering doubts or misunderstandings to sustain high  
345 acceptance rates. The research emphasises the need to use efficient communication  
346 tactics to influence vaccination attitudes and behaviours.

347

348 Although there has been a generally high acceptance of COVID-19 immunisations, the  
349 research highlights that some HCWs still have reservations and are hesitant to be  
350 vaccinated. These worries may arise from various sources, such as disinformation,  
351 apprehension about negative impacts and ambiguity over long-term repercussions.  
352 Public health interventions should prioritise resolving vaccination hesitancy among  
353 HCWs via focused educational programmes, honest communication and personalised  
354 methods that recognise and tackle unique concerns. The research emphasises the need

355 to maintain COVID-19 preventive measures, even among persons who have been  
356 vaccinated.

357

358 The discourse pertaining to compulsory vaccination elicits significant ethical debates.  
359 Although most HCWs in the survey chose to get vaccinated willingly, there were  
360 differing views on whether vaccination should be mandated. Public health authorities  
361 must thoroughly evaluate ethical principles, individual rights and the possible  
362 ramifications of compulsory vaccination programmes on healthcare workers'  
363 autonomy and faith in healthcare systems. When considering whether to require  
364 vaccination, it is important to follow ethical guidelines and engage in effective  
365 communication to address any concerns and create better understanding. The research  
366 emphasises the need for customised strategies for vaccine outreach, specifically  
367 targeting vulnerable groups such as pregnant women and persons with pre-existing  
368 health issues. To guarantee fair distribution and acceptance of vaccines across all  
369 demographic groups, it is important for public health campaigns to prioritise focused  
370 communication, easy access to information, and healthcare settings that provide  
371 support.

372

### 373 **Limitations of the Study**

374 Although the research achieved a high participation rate, sampling bias is possible,  
375 especially if some HCWs were more inclined to participate than others. This has the  
376 potential to restrict the applicability of the results to a wider community of HCWs. The  
377 research depends on data that individuals describe about themselves, which might be  
378 influenced by memory bias or a tendency to provide socially desirable responses.  
379 Respondents may tend to exaggerate their favourable views towards vaccination or  
380 downplay their reluctance, which might result in possible mistakes in the findings. The  
381 study's cross-sectional design hinders demonstrating causal correlations between  
382 variables. Although the research offers useful insights regarding vaccination attitudes  
383 and behaviours at a single moment, longitudinal studies would be necessary to evaluate  
384 changes over time and the effects of treatments.

385

386 The research was conducted at a solitary nursing institution, restricting the  
387 applicability of the results to other healthcare settings or areas. Healthcare  
388 infrastructure, cultural norms and vaccine delivery tactics in various situations may  
389 have varying effects on vaccination dynamics.

390

### 391 **Conclusion**

392 This study demonstrates that while there is general support for COVID-19 vaccination,  
393 concerns about vaccine safety and long-term effects persist. Addressing these concerns

394 through targeted communication and education is essential for increasing vaccine  
395 acceptance and utilisation. The diverse attitudes and perceptions revealed by the study  
396 underscore the need for a comprehensive strategy to address vaccine hesitancy, with a  
397 focus on safety and knowledge deficits.

398

## 399 **Supporting information**

400 **S1 Appendix. Study questionnaire**

401

## 402 **Acknowledgments**

403 Special thanks to the Nursing college management for permitting the study and to the  
404 participants for their involvement in realising the goals of the research.

405

## 406 **Funding**

407 This study was self-funded.

408

## 409 **References**

410

- 411 1. Sema M, Miyazaki Y, Tsutsui T, Tomita M, Eishi Y, and Inase N. Environmental levels of  
412 avian antigen are relevant to the progression of chronic hypersensitivity pneumonitis  
413 during antigen avoidance. *Immun Inflamm Dis*. 2018; 6(1): 154-162.10.1002/iid3.202
- 414 2. Mbele W, Dako-Gyeke P, and Frans AN. COVID-19 vaccination uptake among healthcare  
415 workers in Ghana: A comprehensive analysis of knowledge, attitude, perceived vaccine  
416 effectiveness, and health belief model constructs. *PLOS Glob Public Health*. 2024; 4(5):  
417 e0002738.10.1371/journal.pgph.0002738
- 418 3. Tungoe A, Imchen T, and Walling A. A Study to Assess the Attitude towards COVID-19  
419 Vaccine among Healthcare Personnel in a Secondary Healthcare Centre, Dimapur,  
420 Nagaland. *International Journal of Health Sciences and Research*. 2024; 14(3): 204 -  
421 211.10.52403/ijhsr.20240330
- 422 4. Baba MA, Bigi S, Edhaim A, Bimouh H, Naciri A, Achbani A, Abderrahmane A, and Kharbach  
423 A. Knowledge and attitude towards the acceptance of vaccination against COVID-19  
424 among healthcare professionals in Morocco. *ELECTR J MED ED TE*. 2024; 17(2):  
425 em2405.<https://doi.org/10.29333/ejmets/14696>
- 426 5. Wulan WR, Widianawati E, and Agiwahyunto F. Perception and Belief of Healthcare  
427 Workers regarding the COVID-19 Vaccine: A Cross-Sectional Study and Geographic  
428 Information System Mapping. *Journal of Health Management*. 0(0):  
429 09720634241246941.10.1177/09720634241246941
- 430 6. Mahmud A, Abdullah M, Taib NM, Isa MM, Kqueen CY, and Azman LA. VACCINATION  
431 ATTITUDE AMONG HEALTHCARE WORKERS AT THE EARLY PHASE OF COVID-19 IN  
432 MALAYSIA. *Indonesian Journal of Health Administration (Jurnal Administrasi Kesehatan  
433 Indonesia)*. 2023; 11(2): 322-332.10.20473/jaki.v11i2.2023.322-332
- 434 7. Arathy V, Shailaja S, Patil T, and Pattankar P. Knowledge, attitude and practice towards  
435 COVID-19 booster dose among health care workers: a cross-sectional study. *International  
436 Journal of Community Medicine and Public Health*. 2024; 11(3): 1272 -  
437 1276.10.18203/2394-6040.ijcmph20240631
- 438 8. Łaskawiec-Żuławińska D, Wlaziło M, Grajek M, and Korzonek-Szlacheta I. Attitudes of  
439 health care workers toward COVID-19 vaccination: A literature review. *Applied  
440 Psychology Research*. 2023; 2(1): 347.10.59400/apr.v2i1.347
- 441 9. Zioga S, Katsiroumpa A, Kitsaki M, Moisoglou I, Gallos P, Kolisiati A, and Galanis P. Factors  
442 affecting the intention of healthcare workers and students to receive covid-19 booster

- 443 dose vaccination: a systematic review. Research Square. 2024: 1-20.10.21203/rs.3.rs-  
444 4017592/v1
- 445 10. Health NDo, *COVID-19 Coronavirus vaccine*. 2021, South African Government Publishers.
- 446 11. Karlsson LC, Lewandowsky S, Antfolk J, Salo P, Lindfelt M, Oksanen T, Kivimäki M, and  
447 Soveri A. The association between vaccination confidence, vaccination behavior, and  
448 willingness to recommend vaccines among Finnish healthcare workers. PLoS One. 2019;  
449 14(10): e0224330.10.1371/journal.pone.0224330
- 450 12. Dror AA, Eisenbach N, Taiber S, Morozov NG, Mizrachi M, Zigron A, Srouji S, and Sela E.  
451 Vaccine hesitancy: the next challenge in the fight against COVID-19. Eur J Epidemiol. 2020;  
452 35(8): 775-779.10.1007/s10654-020-00671-y
- 453 13. Islam MS, Siddique AB, Akter R, Tasnim R, Sujan MSH, Ward PR, and Sikder MT.  
454 Knowledge, attitudes and perceptions towards COVID-19 vaccinations: a cross-sectional  
455 community survey in Bangladesh. BMC Public Health. 2021; 21(1): 1851.10.1186/s12889-  
456 021-11880-9
- 457
